# Supplementary material
Source: PubMed Central journal article supplement (PMC4949044)
Supplement: NIHMS787614-supplement-S1.pdf [file NIHMS787614-supplement-S1.pdf]

# Architecture and host interface of environmental chlamydiae revealed by electron cryotomography

Martin Pilhofer, Karin Aistleitner, Mark S. Ladinsky, Lena König, Matthias Horn, Grant J. Jensen

## Supplementary Information

**Figure S1. *Simkania*, *Parachlamydia* and *Protochlamydia* do not recruit mitochondria to their inclusions.**

MitoTracker staining of mitochondria (red) was combined with detection of chlamydiae (green) and the amoeba host (blue) by fluorescence *in situ* hybridization. No significant clustering of mitochondria around inclusions of *Simkania* (A), *Parachlamydia* (B) or *Protochlamydia* (C) was detected in *A. castellanii*. Bars 10  $\mu\text{m}$ .

**Figure S2. More examples of putative *Simkania* T3S structures with sheared-off needles.**

Shown are slices through cryotomograms of purified *Simkania*. Often, a widening of the periplasm and basal body-like densities were observed in the absence of a T3S needle, suggesting some needles are sheared off during purification. Bar 100 nm.

**Movie S1. Crescent bodies are not seen in projection images of plunge-frozen *Parachlamydia* cells.**

**Movie S2. Cryotomogram and 3D model of the *Simkania* inclusion from Figure 3D.**

**Movie S3. Cryotomogram and 3D model of the *Parachlamydia* inclusion from Figure 3L.**

**Movie S4. Cryotomogram and 3D model of the *Protochlamydia* inclusion from Figure 4C.**

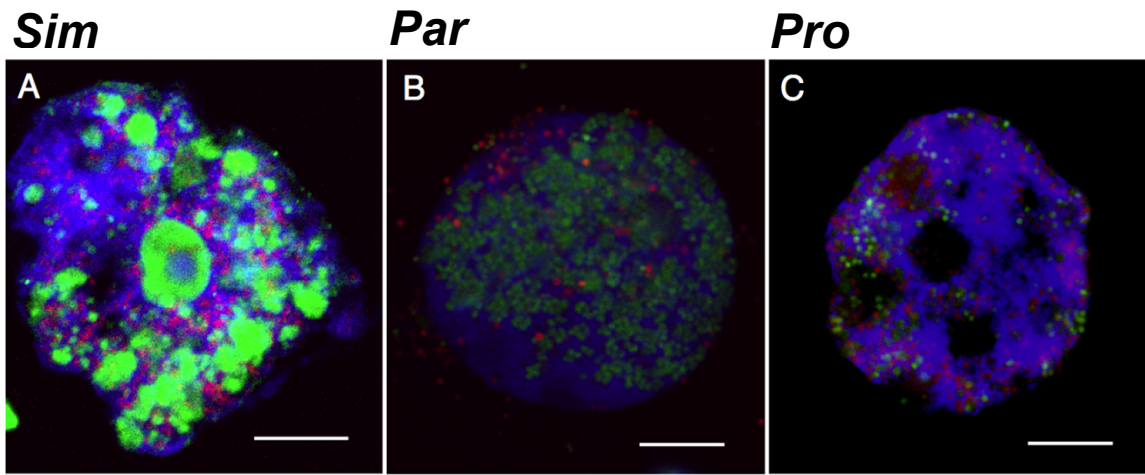

Figure S1

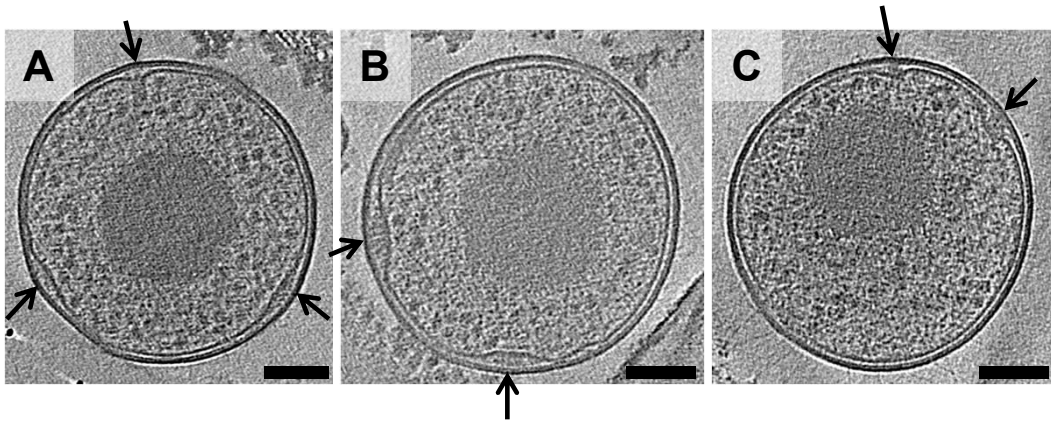

Figure S2
